# Supplementary material
Source: Research Square preprint supplement (doi:10.21203/rs.3.rs-8723238/v1)
Supplement: Supplementary file 1 [file 51de9369cbc6e52366cec2b5.docx]

**Supplementary Materials**

**SFig. 1** (**A-D**) Statistical analysis of cell cycle differences between CDDP-treated cells and untreated cells across different cell groups. (E–H) Statistical analysis of cell cycle differences between PTX-treated cells and untreated cells across different cell groups. ns: no significance; *, P < 0.05; **, P < 0.01; ***, P < 0.001; ****, P < 0.0001.

**SFig. 2** (**A-B**) CCK-8 assay assessing proliferation of different cell lines following exposure to low-concentration CDDP. (**C-D**) CCK-8 assay assessing proliferation of different cell lines following exposure to low-concentration PTX. ns: no significance; *, P < 0.05; **, P < 0.01; ***, P < 0.001; ****, P < 0.0001.
