# Supplementary material
Source: Research Square preprint supplement (doi:10.21203/rs.3.rs-8723238/v1)

**A**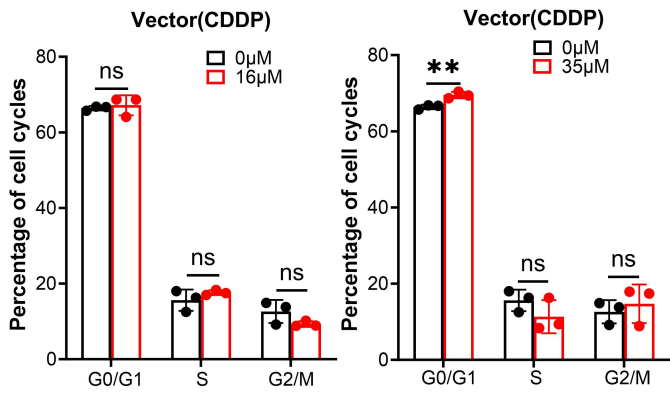**B**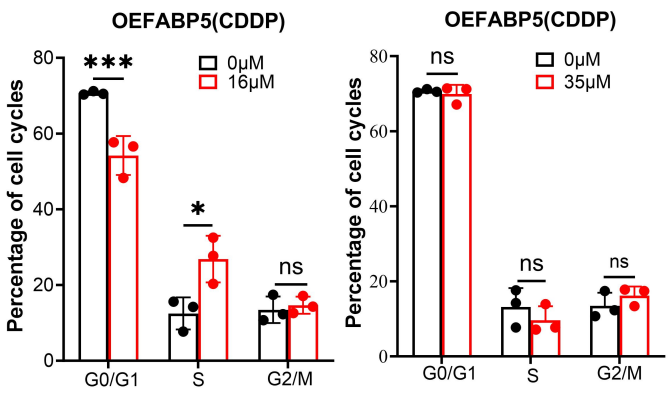**C**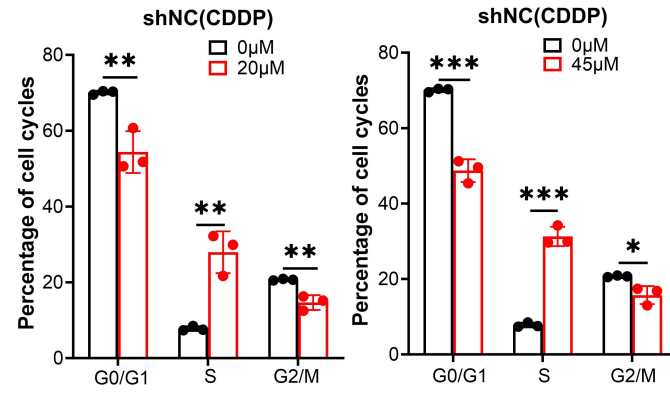**D**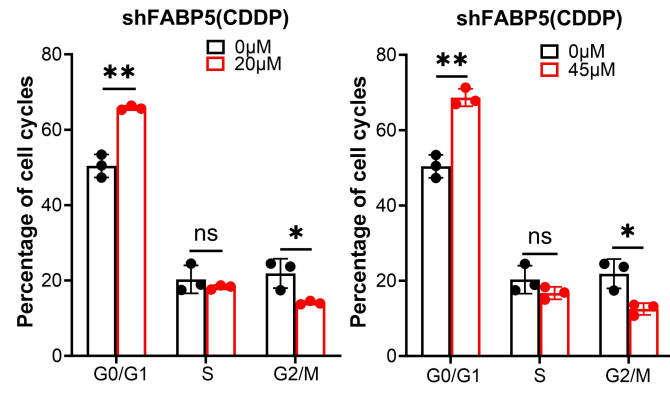**E**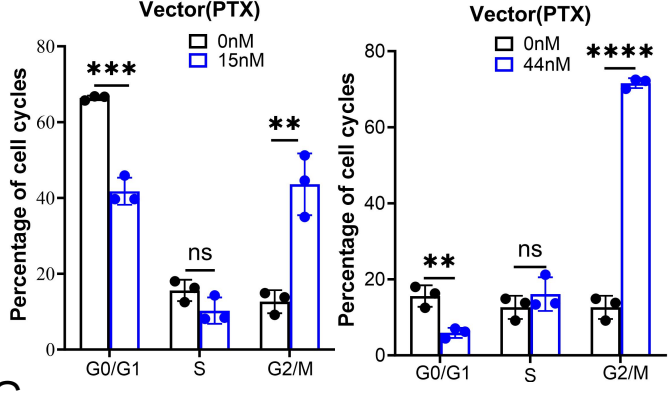**F**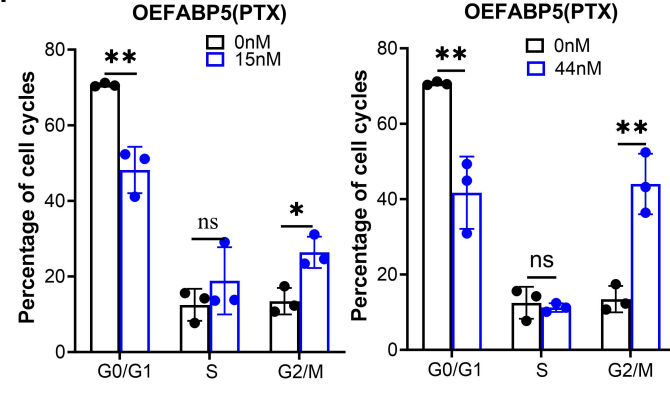**G**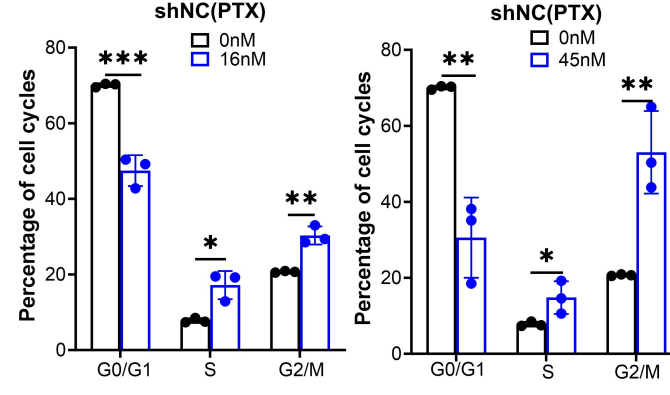**H**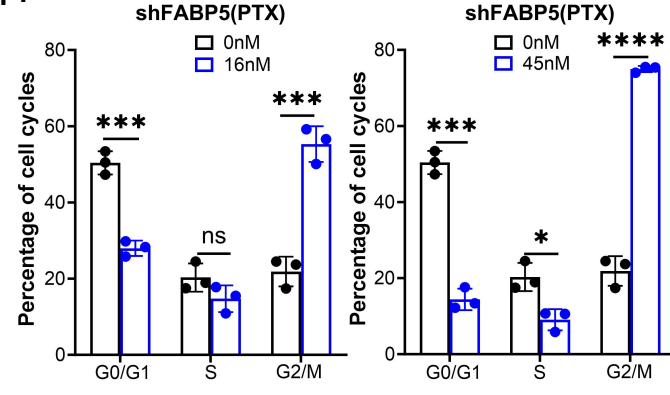

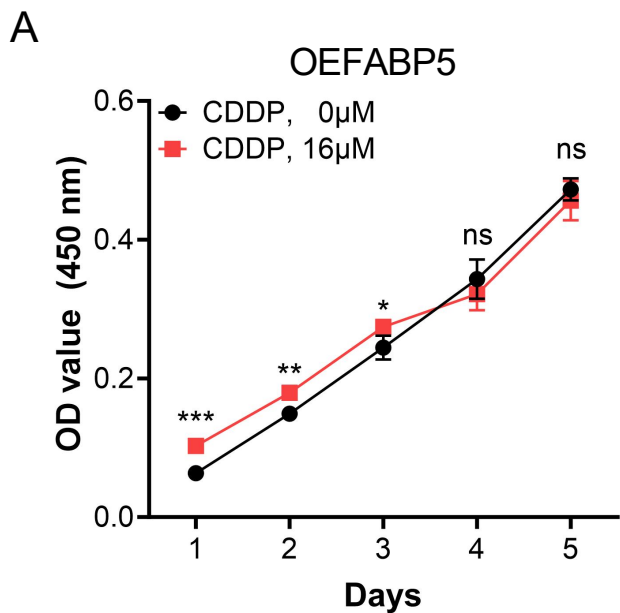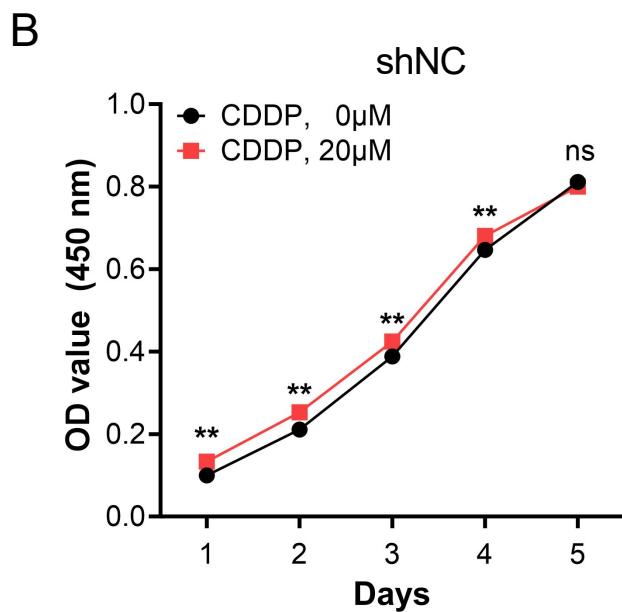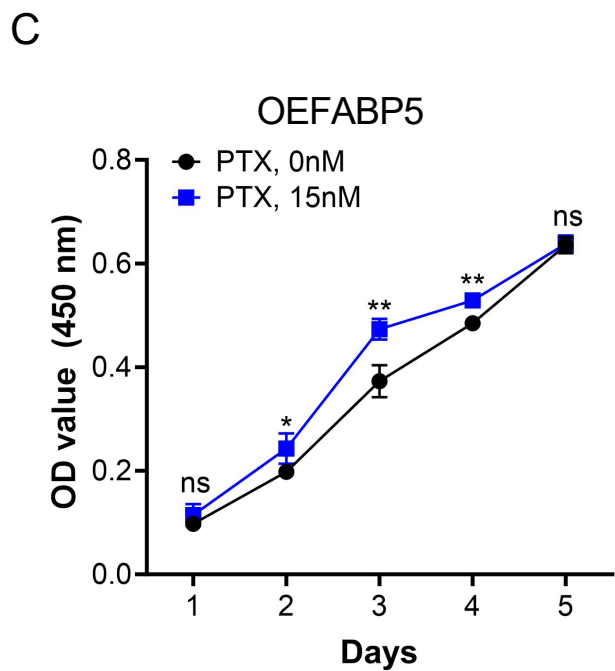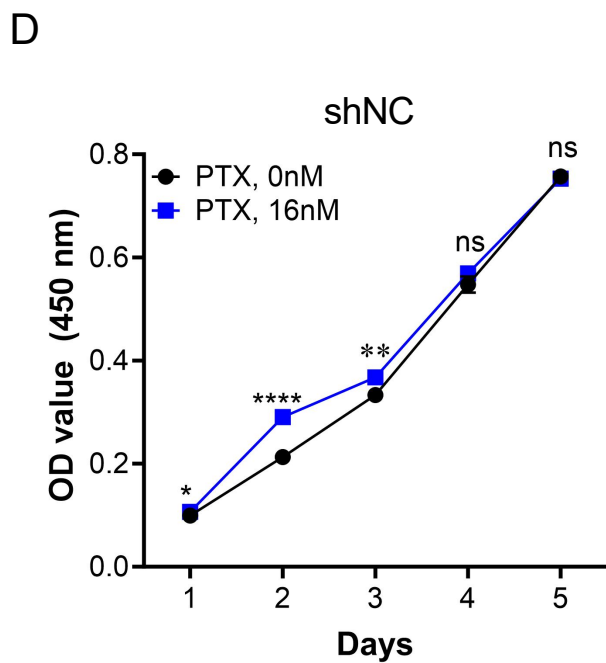

Supplement: Supplementary file 1 [file 23af63e357f1238ee8af6ebd.pdf]
